# Supplementary material for: Illumina sequencing analysis of the ruminal microbiota in high-yield and low-yield lactating dairy cows
Source: PLoS One. 2018 Nov 13;13(11):e0198225. doi: 10.1371/journal.pone.0198225 (PMC6234037; doi:10.1371/journal.pone.0198225)
Supplement: S1 Table — (XLSX) [file pone.0198225.s001.xlsx]

## Sheet: 工作表1
	Supplementary Table 1.Differences rumen microbial abundances between high-yielding and low-yielding dairy cows
	Items	HY	LY	SEM	P-value
	Phyla
	bacteroidetes	49.1	65.61	2.46	<0.01
	firmicutes	44.33	27.71	2.41	<0.01
	proteobacteria	0.93	2.09	0.28	0.04
	tenericutes	1.32	1.57	0.21	0.57
	saccharibacteria	1.07	0.79	0.15	0.38
	Genus
	Prevotella_1	29.14	37.48	2.58	0.11
	Ruminococcaceae-NK4A214-group	7.2	4.12	0.58	<0.01
	Succiniclasticum	7.69	3.57	1.01	0.04
	Prevotellaceae	4.21	5.96	0.54	0.11
	Prevotella_7	0.47	8.41	3.51	0.27
	Bacteroidales_S24-7_group	3.55	3.44	0.37	0.89
	Ruminococcus 2	4.41	1.36	0.48	<0.01
	Bacteroidales_BS11	3.36	2.21	0.51	0.27
	Rikenellaceae_RC9_gut_group	2.67	2.87	0.33	0.77
	Christensenellaceae_R-7_group	3.12	2	0.27	0.03
	Prevotellaceae_UCG-003	2	2.2	0.58	0.74
	Lachnospiraceae-NK3A20-group	2.91	1.18	0.27	<0.01
	Ruminococcaceae_UCG-014	1.87	1.99	0.25	0.82
	Prevotellaceae_UCG-001	1.36	1.55	0.18	0.62
	[Eubacterium]-coprostanoligenes-group	1.93	0.8	0.2	<0.01
